# Supplementary material
Source: HighWire-hosted journal article supplement (https://ebmtp.com/highwire/filestream/136856/field_highwire_adjunct_files/0/scher_1246.pdf)
Supplement: scher_1246.pdf [file scher_1246.pdf]

# 中年偏头痛与老年帕金森病

## AGES-Reykjavik研究

Ann I. Scher, PhD;G. Webster Ross, MD;Sigurdur Sigurdsson, MSc;Melissa Garcia, MPH;Larus S. Gudmundsson, PhD;  
Sigurlaug Sveinbjörnsdóttir, MD;Amy K. Wagner, MD;Vilmundur Gudnason, MD, PhD;Lenore J. Launer, PhD

**目的：**既往认为，老年帕金森病及相关的不宁腿综合征(restless legs syndrome, 又叫 Willis-Ekbom 病)的发生可能与中年偏头痛有关。本研究的目的旨在验证中年偏头痛与老年帕金森病之间的关联。

**方法：**自 1967 年启动的 AGES-Reykjavik 队列研究中，根据不同症状将出生于 1907~1935 年的中年偏头痛患者分为不同亚组并予以追踪观察，并于 2002~2006 年对入组的 5,764 例患者再次检查，评估其帕金森病的症状，并统计确诊帕金森病(Parkinson Disease, PD)、PD 家族史，及诊断不宁腿综合征的情况。

**结果：**中年偏头痛患者，尤其是先兆偏头痛(migraine with aura, MA)患者在老年期更容易出现帕金森病的症状 [ 比值比(odds ratio OR) ] MA = 3.6(95% CI 2.7~4.8) ] 和患帕金森病 [ORMA = 2.5(95%CI 1.2~5.2)]。先兆偏头痛女性患者的父母 [ORMA = 2.26 (95%CI 1.3~4.0) ] 或同胞 [ORMA = 1.78 (95%CI 1.1~2.9) ] 更易患帕金森病。中年偏头痛患者老年以

后不宁腿综合征的发病率普遍增高。中年偏头痛与这些疾病之间的相关性独立于心血管疾病及脑血管疾病（依据磁共振检查）因素之外。

**结论：** 上述研究表明偏头痛与帕金森病之间可能存在相同的致病因素或互为因果。因此，有必要进一步开展遗传学研究和纵向观察研究，以探索它们之间可能存在的共同发病机制。*Neurology*<sup>®</sup> 2014;83:1246–1252

（林鹏飞 译 焉传祝 审校）
